# Supplementary material for: R2R3-MYB transcription factor MYB113 specifically regulates anthocyanin accumulation in Lycium ruthenicum
Source: Research Square preprint supplement (doi:10.21203/rs.3.rs-8634276/v1), 2026-01-22
Supplement: Supplementary file 1 [file 50b97de46871125fcfb43e85.docx]

# Table S1

|  | **Primer name**​ | **Sequence (5'→3')** |
| --- | --- | --- |
| **RT-qPCR** | *Lractin*-RT-F | CTCAGCACCTTCCAGCAGAT |
| *Lractin*-RT-R | TAACACTGCAACCGCATTTC |
| *LrPAL*-RT-F | TGATCTTGTCCCTTTGTCC |
| *LrPAL*-RT-R | CCTTCTTTAGGCTGCAACTC |
| *LrC4H*-RT-F | TAGTCAACCACCCTCACATC |
| *LrC4H*-RT-R | AGAGTCTCCTTGACCACAGC |
| *Lr4CL*-RT-F | AAGCAACCTCAGCAACACT |
| *Lr4CL*-RT-R | GGACCTGATATGCCTTGTA |
| *LrCHS*-RT-F | TGGAGGAGTATCGTAAGGC |
| *LrCHS*-RT-R | CTTGTGCTCGCTATCAGTG |
| *LrCHI*-RT-F | GGGAGCTGAGCTAACTGAA |
| *LrCHI*-RT-R | CTAAACGATCACGTATGGC |
| *LrF3H*-RT-F | CGTCAACACTAACGGCTCTA |
| *LrF3H*-RT-R | TTCACCTCTTCTTCCATCAA |
| *LrF3’H*-RT-F | AACATGGAGGAAGCATTTGG |
| *LrF3’H*-RT-R | TGGCCAGATGTGTTAAAAGC |
| *LrF3'5'H*-RT-F | AAGCACAACAAGAAATGGAC |
| *LrF3'5'H*-RT-R | TTTAATGGTGTTGAAGGGTG |
| *LrFLS*-RT-F | CCGTCAGACCATGAAGTTGG |
| *LrFLS*-RT-R | CAAAGCATAATACTGATGAAGTCAC |
| *LrDFR*-RT-F | TCTGTTAGAATTGCCGAAAG |
| *LrDFR*-RT-R | CTCGAAATCCATAGGTGTTG |
| *LrANS*-RT-F | GCAAATAGTGCTTCTGGTCA |
| *LrANS*-RT-R | CTTTGTTGCTAGGTTCCTTA |
| *LrLAR*-RT-F | AAGTGTGGTTGCAGCTTTGACA |
| *LrLAR*-RT-R | ATTTTGGGCATGTCATCCATCT |
| *LrANR*-RT-F | CCTCTCTCATGGCTGGTCCTTA |
| *LrANR*-RT-R | GGGCACGACAAACATCCTCTAC |
| *LrUFGT*-RT-F | AGTCCATGAAAGAGGCAGAG |
| *LrUFGT*-RT-R | AGAACAAGAACCAGCAGTCC |
| *LrMYB113*-RT-F | GCAGGAAGAGTTGCAGGCTAAG |
| *LrMYB113*-RT-R | TGGTGTTGTTCTTCACGCCT |
| *NtGPDH*-RT-F | CTGGTGCTGATTTCGTTGTG |
| *NtGPDH*-RT-R | TTCGGGCTTGTATTCCTTCTC |
| *NtCHS*-RT-F | TGACACCCACTTGGATAGTTTAG |
| *NtCHS*-RT-R | CGACCTCTGGAATTGGATCAG |
| *NtCHI*-RT-F | CTTTTCTCGCCGCTAAATG |
| *NtCHI*-RT-R | TTTCTGCCACCTTCTCTG |
| *NtF3H*-RT-F | CAAGGCATGTGTGGATATGG |
| *NtF3H*-RT-R | TGTGTCGTTTCAGTCCAAGG |
| *NtF3'H*-RT-F | AGGCTCAACACTTCTCGT |
| *NtF3'H*-RT-R | CATCAACTTTGGGCTTCT |
| *NtF3'5'H*-RT-F | CGCACTACCATACTTAGGAGCCAT |
| *NtF3'5'H*-RT-R | CAGCATCAGGAGTAGAAGCAACAG |
| *NtDFR*-RT-F | AACCAACAGTCAGGGGAATG |
| *NtDFR*-RT-R | TTGGCGTGAAGCTCATACTG |
| *NtANS*-RT-F | TGGCGTTGAAGCTCATACTG |
| *NtANS*-RT-R | GGAATTAGGCACACACTTTGC |
| *NtUFGT*-RT-F | GAGTGCATTGGATGCCTTTT |
| *NtUFGT*-RT-R | CCAGCTCCATTAGGTCCTTG |
| **Gene cloning** | *LrMYB113*-F | ATGAGTACTTCTAATGATAAGC |
| *LrMYB113*-R | GCCTTTTAATTAAGTAGATTCC |
| *LrMYBJAF13*-F | ATGGCTATAGGACACCAAGA |
| *LrMYBJAF13*-R | TCAAGATTTCCAGACTACTC |
| *LrMYBAN11*-F | ATGGAGAATTCAAGTCAAGA |
| *LrMYBAN11*-R | TTATACTTTAAGCATCTGCA |
| **Construction of the PEAQ vector** | PEAQ-*LrMYB113*-F | CACCATCACCATCATCCCGGGATGAGTACTTCTAATGATAA |
| PEAQ-*LrMYB113*-R | TGAAACCAGAGTTAAAGGCCTTTAATTAAGTAGATTCCAAA |
| PEAQ-*LrMYBJAF13*-F | CACCATCACCATCATCCCGGGATGGCTATAGGACACCAAGA |
| PEAQ-*LrMYBJAF13*-R | TGAAACCAGAGTTAAAGGCCTTCAAGATTTCCAGACTACTC |
| PEAQ-*LrMYBAN11*-F | CACCATCACCATCATCCCGGGATGGAGAATTCAAGTCAAGA |
| PEAQ-*LrMYBAN11*-R | TGAAACCAGAGTTAAAGGCCTTTATACTTTAAGCATCTGCA |
| PEAQ-F | TTCTGCCCAAATTCGCGACC |
| PEAQ-M113-R | CTCGATGCCACTTTCCTTCTC |
| **Subcellular localization** | *LrMYB113*-GPF-F | GAGCTCGGTACCCGGGGATCCATGAGTACTTCTAATGATAAGC |
| *LrMYB113*-GPF-R | GCTCACCATGTCGACTCTAGATTTTAATTAAGTAGATTCC |
| 1300-GFP-F | CACTATCCTTCGCAAGACCC |
| **Y1H/Y2H** | *LrMYB12*-AD-F | GCCATGGAGGCCAGTGAATTCATGGGAAGAGCACCTTGTTG |
| *LrMYB12*-AD-R | CAGCTCGAGCTCGATGGATCCCTAAGACAAAAGCCAATCGA |
| *LrMYB12*-BD-F | TATGGCCATGGAGGCCGAATTCATGGGAAGAGCACCTTGTTG |
| *LrMYB12*-BD-R | CCGCTGCAGGTCGACGGATCCCTAAGACAAAAGCCAATCGA |
| *LrMYB113*-AD-F | GCCATGGAGGCCAGTGAATTCATGAGTACTTCTAATGATAAGC |
| *LrMYB113*-AD-R | CAGCTCGAGCTCGATGGATCCGCCTTTTAATTAAGTAGATTCC |
| *LrMYB113*-BD-F | TATGGCCATGGAGGCCGAATTCATGAGTACTTCTAATGATAAGC |
| *LrMYB113*-BD-R | CCGCTGCAGGTCGACGGATCCGCCTTTTAATTAAGTAGATTCC |
| **BiFc** | *LrMYB113*-103-F | ATTACAGGTACCCGGGGATCCATGAGTACTTCTAATGATAAGC |
| *LrMYB113*-103-R | GCTCACCATACCGCCGTCGACTTTTAATTAAGTAGATTCC |
| *LrMYB113*-104-F | ATTACAGGTACCCGGGGATCCATGAGTACTTCTAATGATAAGC |
| *LrMYB113*-104-R | CACGCTGCCACCGCCGTCGACTTTTAATTAAGTAGATTCC |
| *LrJAF13*-103-F | ATTACAGGTACCCGGGGATCCATGGCTATAGGACACCAAGATC |
| *LrJAF13*-103-R | GCTCACCATACCGCCGTCGACAGATTTCCAGACTACTCTCTG |
| *LrJAF13*-104-F | ATTACAGGTACCCGGGGATCCATGGCTATAGGACACCAAGATC |
| *LrJAF13*-104-R | CACGCTGCCACCGCCGTCGACAGATTTCCAGACTACTCTCTG |
| *LrAN11*-103-F | ATTACAGGTACCCGGGGATCCATGGAGAATTCAAGTCAAGAATC |
| *LrAN11*-103-R | GCTCACCATACCGCCGTCGACTACTTTAAGCATCTGCAACTTG |
| *LrAN11*-104-F | ATTACAGGTACCCGGGGATCCATGGAGAATTCAAGTCAAGAATC |
| *LrAN11*-104-R | CACGCTGCCACCGCCgtcgacTACTTTAAGCATCTGCAACTTG |
| 103/104-F | GGGACGAGCTCAGTGTATTT |
| **Dual-Luc assay** | *pro*-*LrDFR*-LUC-F | ACTATAGGGCGAATTGGGTACCGACAGAGATAATTGTCATCCACTCC |
| *pro*-*LrDFR*-LUC-R | CGCTCTAGAACTAGTGGATCCTGCATGAGCTTCACTTGCCAT |
| *pro*-*LrANS*-LUC-F | ACTATAGGGCGAATTGGGTACCGGTGTGACCTTCTGTAATCGACTC |
| *pro*-*LrANS*-LUC-R | CGCTCTAGAACTAGTGGATCCCTTTGTATGAATAAAATAAATTCC |
