# Supplementary material for: R2R3-MYB transcription factor MYB113 specifically regulates anthocyanin accumulation in Lycium ruthenicum
Source: Research Square preprint supplement (doi:10.21203/rs.3.rs-8634276/v1), 2026-01-22
Supplement: Supplementary file 2 [file cc78a998d07832c402776497.docx]

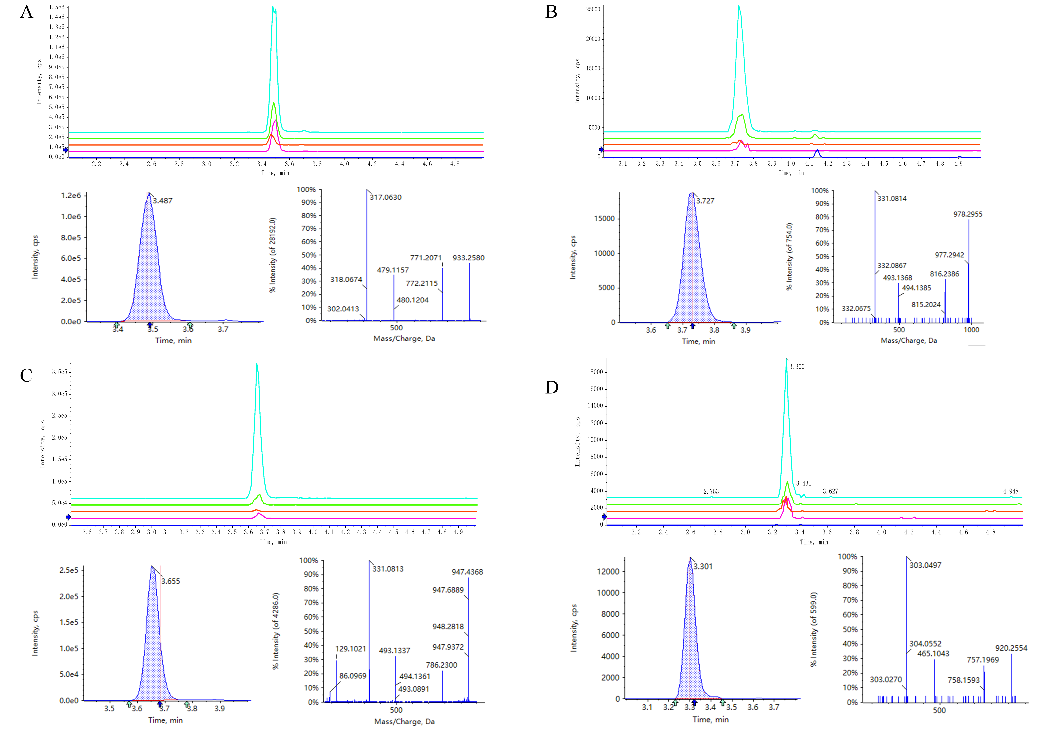


Fig S1: Analysis of Anthocyanin Derivatives in LrMYB113Transgenic Hairy Root Lines of L. ruthenicum by High-Performance Liquid Chromatography-Mass Spectrometry (HPLC-MS). (A)HPLC-MS analysis of petunidin derivatives in hairy roots of *LrMYB113* overexpression lines from *L. ruthenicum*. (B)HPLC-MS analysis of petunidin derivatives in hairy roots of *LrMYB113* overexpression lines from *L. ruthenicum*. (C) HPLC-MS analysis of malvidin derivative 2 in hairy roots of *LrMYB113* overexpression lines from *L. ruthenicum*. (D)HPLC-MS analysis of delphinidin derivative 2 in hairy roots of *LrMYB113* overexpression lines from *L. ruthenicum*.
